# Supplementary material for: Aggregation assisted turn-on response of ANS dye towards protamine
Source: Royal Society of Chemistry journal article supplement (doi:10.1039/d2nj05337c), 2022-12-13
Supplement: d2nj05337c1.pdf [file d2nj05337c1.pdf]

# Aggregation Assisted Turn-On Response of ANS Dye towards Protamine

Dibya Kanti Mal<sup>a</sup>, Padma Nilaya Jonnalagadda<sup>a,b</sup>, and Goutam Chakraborty<sup>b\*</sup>

<sup>a</sup>Homi Bhabha National Institute, Anushaktinagar, Mumbai-400094.

<sup>b</sup>Laser and Plasma Technology Division, Bhabha Atomic Research Centre, Mumbai-400085.

| S.N. | Table of content                                                                                                                                                                                                                                                                                                                                                                                                 | Page  |
|------|------------------------------------------------------------------------------------------------------------------------------------------------------------------------------------------------------------------------------------------------------------------------------------------------------------------------------------------------------------------------------------------------------------------|-------|
| 1    | <b>Figure S1.</b> Linear fit of intensity change of ANS against Pr concentration in the dynamic range of 0 to 0.32 $\mu\text{M}$ for LOD determination. ( $I_{486} = 32.64 \times 10^3 [\text{Pr}/\mu\text{M}] + 7165.4$ ; $R^2 = 0.993$ , LOD $\sim 4.05$ nM, standard dev = 44.1)                                                                                                                              | S2    |
| 2    | <b>Figure S2.</b> Normalized emission spectra of 180 $\mu\text{M}$ ANS at (1) 0 and (10) 3.67 $\mu\text{M}$ of Pr.                                                                                                                                                                                                                                                                                               | S2    |
| 3    | <b>Figure S3.</b> Emission spectra of ANS-Pr complex (180 $\mu\text{M}$ ANS + 3.5 $\mu\text{M}$ Pr) with change in pH of the medium from 3.06 to 9.83. Inset: Variation of emission intensity of ANS-Pr complex at 486 nm with pH of the medium.                                                                                                                                                                 | S3    |
| 4    | <b>Figure S4.</b> Emission spectra of ANS (180 $\mu\text{M}$ ) with change in pH of the medium from 2.00 to 11.91. Inset: Variation of emission intensity of ANS complex at 524 nm with pH of the medium.                                                                                                                                                                                                        | S3    |
| 5    | <b>Figure S5.</b> Peak normalized emission spectra of ANS-Pr complex (180 $\mu\text{M}$ ANS+3.5 $\mu\text{M}$ Pr) at 0 (black dashed) and 46.94 mM (light green) NaCl.                                                                                                                                                                                                                                           | S4    |
| 6    | <b>Figure S6.</b> Excited-state decay traces of ANS-Pr complex (180 $\mu\text{M}$ ANS+3.5 $\mu\text{M}$ Pr) with increase in NaCl concentration (in mM): (1) 0, (2) 3.14, (3) 11.98, (4) 22.54, (5) 31.93, (6) 40.34 and (7) 56.35. Inset: Decrease in mean fluorescence lifetime of ANS-Pr complex as a function increasing NaCl concentration. $\lambda_{\text{ex}} = 405$ nm, $\lambda_{\text{em}} = 486$ nm. | S4    |
| 7    | <b>Figure S7.</b> Peak normalized emission spectra of ANS-Pr complex (180 $\mu\text{M}$ ANS+3.5 $\mu\text{M}$ Pr) at 20 °C (dark yellow dashed) and 70 °C (red).                                                                                                                                                                                                                                                 | S5    |
| 8    | <b>Figure S8.</b> Peak normalized emission spectra of ANS-Pr complex (180 $\mu\text{M}$ ANS+3.5 $\mu\text{M}$ Pr) at 0 (light green dashed) and 3.41 $\mu\text{M}$ (red) Hp.                                                                                                                                                                                                                                     | S5    |
| 9    | <b>Figure S9.</b> Excited-state decay traces of ANS-Pr complex (180 $\mu\text{M}$ ANS+3.5 $\mu\text{M}$ Pr) with increase in heparin (Hp) concentration (in $\mu\text{M}$ ): (1) 0, (2) 1.72, (3) 2.38, (4) 2.66, (5) 2.92 and (6) 3.98. Inset: Reduction of mean fluorescence lifetime of ANS-Pr complex as a function of Hp concentration. $\lambda_{\text{ex}} = 405$ nm, $\lambda_{\text{em}} = 486$ nm.     | S6    |
| 10   | <b>Table S1.</b> Fluorescence decay parameters for ANS-Pr complex (180 $\mu\text{M}$ ANS+3.5 $\mu\text{M}$ Pr) in water at different concentrations of NaCl.                                                                                                                                                                                                                                                     | S6-S7 |
| 11   | <b>Table S2.</b> Fluorescence decay parameters for ANS-Pr complex (180 $\mu\text{M}$ ANS+ 3.5 $\mu\text{M}$ Pr) in water at different concentrations of Heparin (Hp).                                                                                                                                                                                                                                            | S7    |

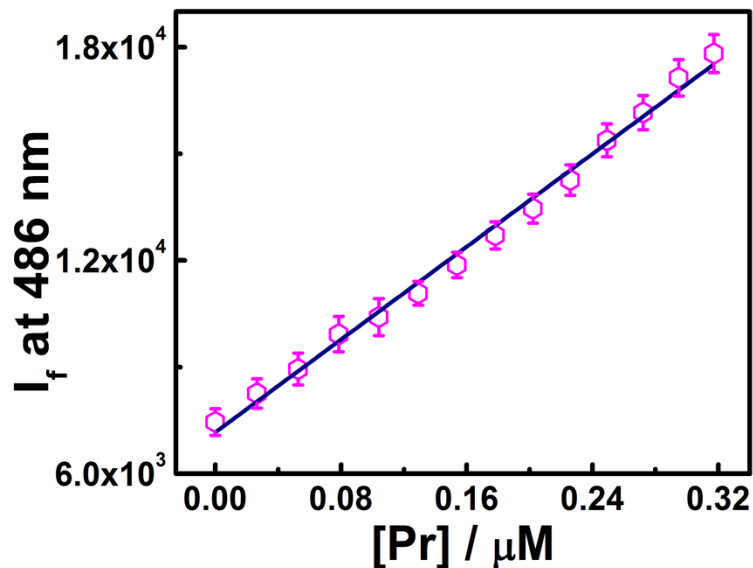

**Figure S1.** Linear fit of intensity change of ANS against Pr concentration in the dynamic range of 0 to 0.32  $\mu\text{M}$  for LOD determination. ( $I_{486} = 32.64 \times 10^3 [\text{Pr}/\mu\text{M}] + 7165.4$ ;  $R^2 = 0.993$ , LOD  $\sim 4.05$  nM, standard dev = 44.1, obtained from 10 successive measurements of free ANS in water).

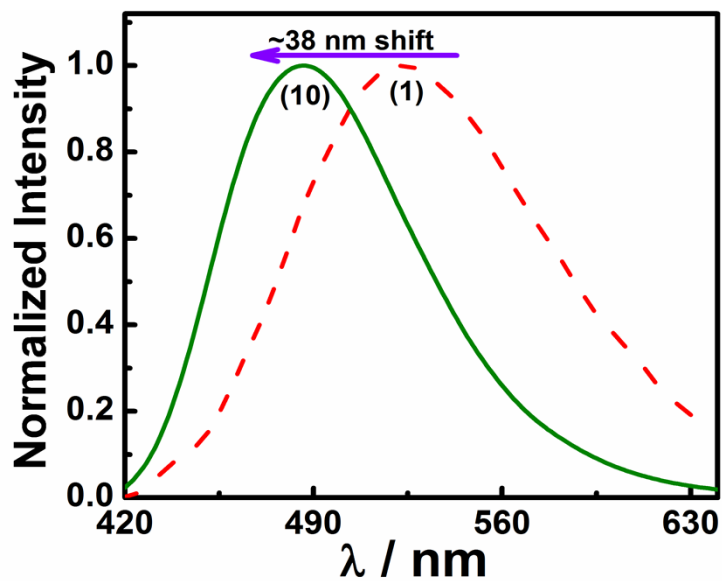

**Figure S2.** Normalized emission spectra of 180  $\mu\text{M}$  ANS at (1) 0 and (10) 3.67  $\mu\text{M}$  of Pr.

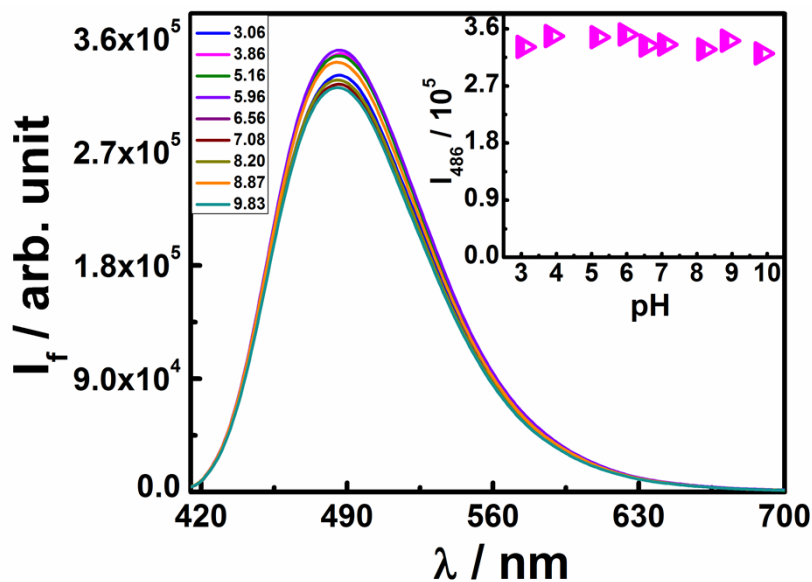

**Figure S3.** Emission spectra of ANS-Pr complex (180  $\mu\text{M}$  ANS + 3.5  $\mu\text{M}$  Pr) with change in pH of the medium from 3.06 to 9.83. Inset: Variation of emission intensity of ANS-Pr complex at 486 nm with pH of the medium.

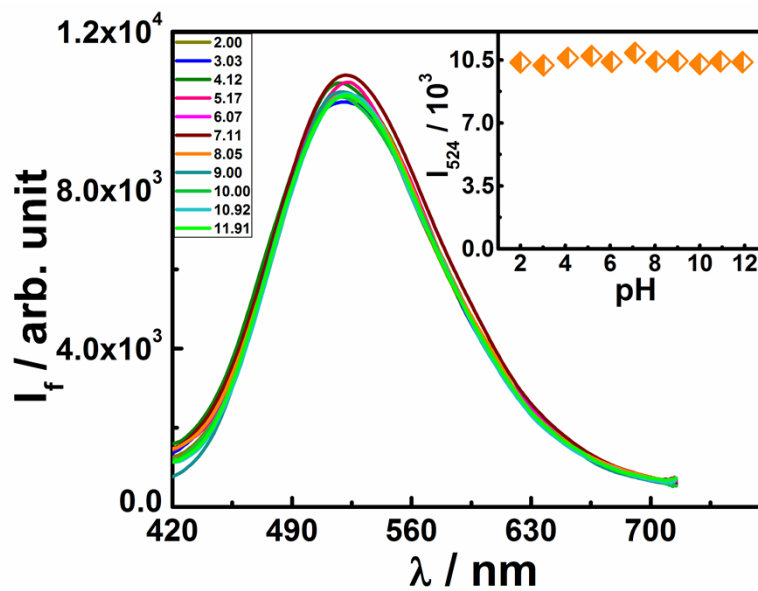

**Figure S4.** Emission spectra of ANS (180  $\mu\text{M}$ ) with change in pH of the medium from 2.00 to 11.91. Inset: Variation of emission intensity of ANS complex at 524 nm with pH of the medium.

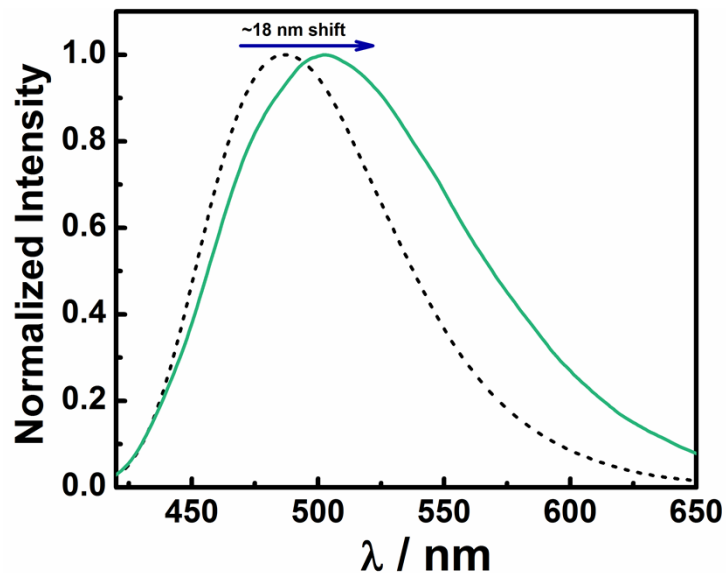

**Figure S5.** Peak normalized emission spectra of ANS-Pr complex (180  $\mu$ M ANS+3.5  $\mu$ M Pr) at 0 (black dashed) and 46.94 mM (light green) NaCl.

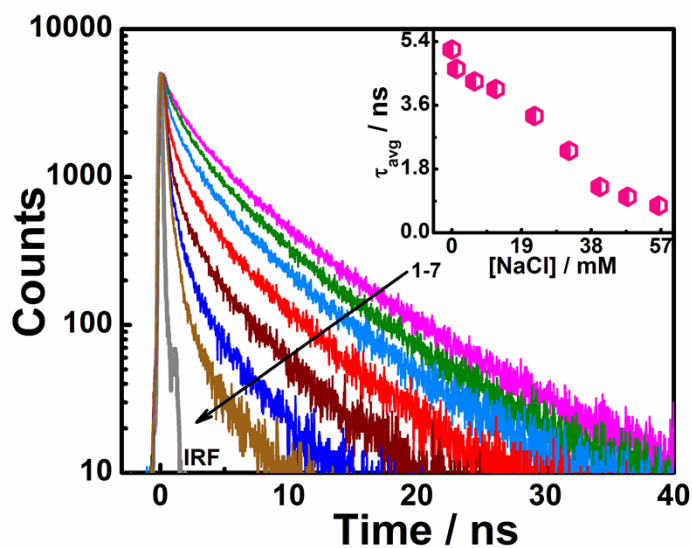

**Figure S6.** Excited-state decay traces of ANS-Pr complex (180  $\mu$ M ANS+3.5  $\mu$ M Pr) with increase in NaCl concentration (in mM): (1) 0, (2) 3.14, (3) 11.98, (4) 22.54, (5) 31.93, (6) 40.34 and (7) 56.35. Inset: Decrease in mean fluorescence lifetime of ANS-Pr complex as a function increasing NaCl concentration.  $\lambda_{\text{ex}} = 405$  nm,  $\lambda_{\text{em}} = 486$  nm.

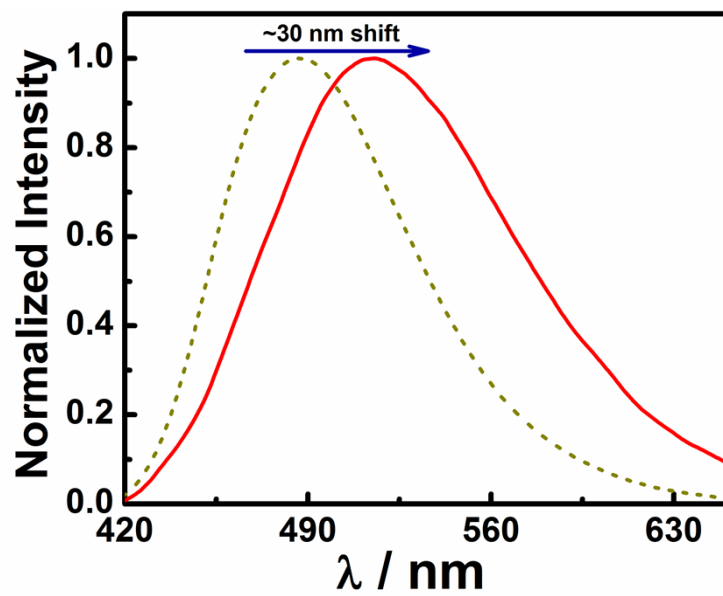

**Figure S7.** Peak normalized emission spectra of ANS-Pr complex (180  $\mu$ M ANS+3.5  $\mu$ M Pr) at 20 °C (dark yellow dashed) and 70 °C (red).

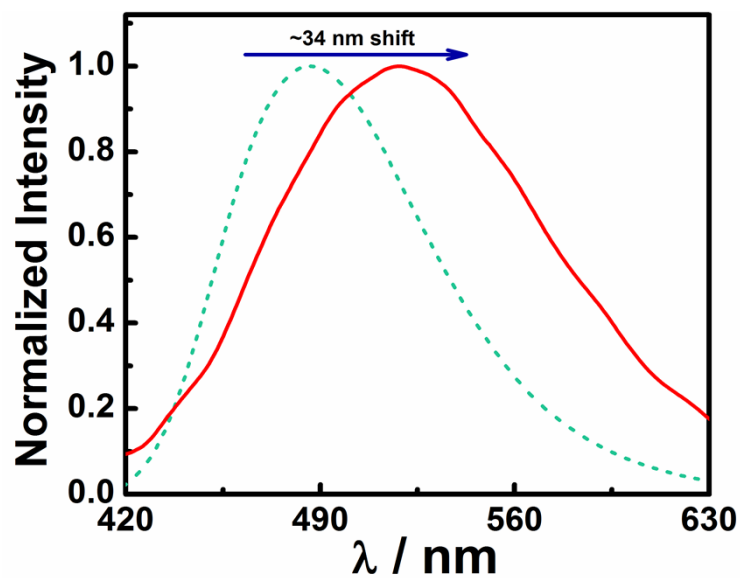

**Figure S8.** Peak normalized emission spectra of ANS-Pr complex (180  $\mu$ M ANS+3.5  $\mu$ M Pr) at 0 (light green dashed) and 3.41  $\mu$ M (red) Hp.

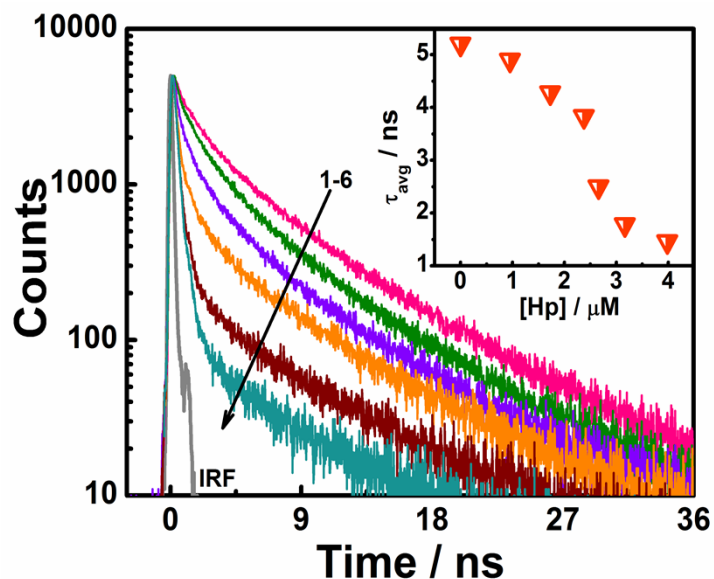

**Figure S9.** Excited-state decay traces of ANS-Pr complex (180  $\mu\text{M}$  ANS+3.5  $\mu\text{M}$  Pr) with increase in heparin (Hp) concentration (in  $\mu\text{M}$ ): (1) 0, (2) 1.72, (3) 2.38, (4) 2.66, (5) 2.92 and (6) 3.98. Inset: Reduction of mean fluorescence lifetime of ANS-Pr complex as a function of Hp concentration.  $\lambda_{\text{ex}} = 405$  nm,  $\lambda_{\text{em}} = 486$  nm.

**Table S1.** Fluorescence decay parameters for ANS-Pr complex (180  $\mu\text{M}$  ANS+3.5  $\mu\text{M}$  Pr) in water at different concentrations of NaCl.

| Conc. of NaCl ( $\mu\text{M}$ ) | $\tau_1$ (ns) | $A_1$ (%) | $\tau_2$ (ns) | $A_2$ (%) | $\tau_3$ (ns) | $A_3$ (%) | $\tau_{\text{avg}}$ (ns) |
|---------------------------------|---------------|-----------|---------------|-----------|---------------|-----------|--------------------------|
| 0                               | 0.46          | 6.5       | 2.46          | 32.3      | 7.12          | 61.2      | 5.18                     |
| 0.53                            | 0.45          | 6.4       | 2.29          | 30.8      | 6.97          | 62.8      | 5.11                     |
| 1.27                            | 0.44          | 7.6       | 2.25          | 35.2      | 6.66          | 57.2      | 4.63                     |
| 3.14                            | 0.41          | 7.8       | 2.12          | 35.0      | 6.60          | 57.2      | 4.55                     |
| 6.18                            | 0.36          | 9.8       | 1.98          | 34.5      | 6.40          | 55.7      | 4.28                     |
| 11.98                           | 0.34          | 13.0      | 1.96          | 33.7      | 6.30          | 53.3      | 4.06                     |
| 22.54                           | 0.29          | 24.8      | 1.93          | 33.5      | 6.20          | 41.7      | 3.30                     |
| 31.93                           | 0.27          | 41.3      | 1.65          | 26.8      | 5.54          | 31.9      | 2.32                     |

|       |      |      |      |      |      |      |      |
|-------|------|------|------|------|------|------|------|
| 40.34 | 0.26 | 60.1 | 1.26 | 19.6 | 4.45 | 20.3 | 1.30 |
| 47.90 | 0.26 | 70.3 | 1.46 | 17.0 | 4.66 | 12.7 | 1.02 |
| 56.35 | 0.26 | 79.0 | 1.35 | 12.2 | 4.57 | 8.8  | 0.77 |

**Table S2.** Fluorescence decay parameters for ANS-Pr complex (180  $\mu\text{M}$  ANS+ 3.5  $\mu\text{M}$  Pr) in water at different concentrations of Heparin (Hp).

| <b>Conc. of Hp<br/>(<math>\mu\text{M}</math>)</b> | <b><math>\tau_1</math> (ns)</b> | <b>A<sub>1</sub> (%)</b> | <b><math>\tau_2</math> (ns)</b> | <b>A<sub>2</sub> (%)</b> | <b><math>\tau_3</math> (ns)</b> | <b>A<sub>3</sub> (%)</b> | <b><math>\tau_{\text{avg}}</math>(ns)</b> |
|---------------------------------------------------|---------------------------------|--------------------------|---------------------------------|--------------------------|---------------------------------|--------------------------|-------------------------------------------|
| 0                                                 | 0.37                            | 6.6                      | 2.18                            | 30.9                     | 7.20                            | 62.5                     | 5.20                                      |
| 0.95                                              | 0.35                            | 7.2                      | 2.15                            | 34.9                     | 7.14                            | 57.9                     | 4.90                                      |
| 1.36                                              | 0.34                            | 9.3                      | 2.10                            | 38.3                     | 7.14                            | 52.4                     | 4.57                                      |
| 1.73                                              | 0.34                            | 13.1                     | 2.05                            | 38.4                     | 7.14                            | 48.5                     | 4.28                                      |
| 2.07                                              | 0.32                            | 19.4                     | 2.03                            | 33.0                     | 7.12                            | 47.6                     | 4.12                                      |
| 2.38                                              | 0.26                            | 33.6                     | 1.90                            | 18.6                     | 7.10                            | 47.8                     | 3.83                                      |
| 2.66                                              | 0.24                            | 61.1                     | 1.50                            | 6.7                      | 7.00                            | 32.2                     | 2.50                                      |
| 2.93                                              | 0.24                            | 69.4                     | 1.40                            | 5.8                      | 7.00                            | 24.8                     | 1.98                                      |
| 3.17                                              | 0.24                            | 72.8                     | 1.30                            | 4.8                      | 6.90                            | 22.4                     | 1.78                                      |
| 3.98                                              | 0.24                            | 76.2                     | 1.00                            | 6.0                      | 6.85                            | 17.8                     | 1.46                                      |
